# Supplementary material
Source: ML conference proceedings conference paper supplement (https://proceedings.neurips.cc/paper_files/paper/2023/hash/571fcbd2ad4273d9df51d7abc1172112-Abstract.html)
Supplement: Supplementary file 1 [file 571fcbd2ad4273d9df51d7abc1172112-Supplemental-Conference.pdf]

## Supplementary Material

### A Background on Hermite Polynomials

Recall the definition of the probabilist's Hermite polynomials:

$$He_n(x) = (-1)^n e^{x^2/2} \cdot \frac{d^n}{dx^n} e^{-x^2/2}.$$

Under this definition, the first four Hermite polynomials are

$$He_0(x) = 1, He_1(x) = x, He_2(x) = x^2 - 1, He_3(x) = x^3 - 3x.$$

In our work, we will consider the *normalized* Hermite polynomial of degree  $n$  to be  $h_n(x) = \frac{He_n(x)}{\sqrt{n!}}$ . These normalized Hermite polynomials form a complete orthogonal basis for inner product space  $\mathcal{L}^2(\mathbb{R}, \mathcal{N})$ . To obtain an orthogonal basis for  $\mathcal{L}^2(\mathbb{R}^d, \mathcal{N}_d)$ , we will use a multi-index  $J = (j_1, \dots, j_d) \in \mathbb{N}^d$  to define the  $d$ -variate normalized Hermite polynomial as  $H_J(\mathbf{x}) = \prod_{i=1}^d h_{j_i}(x_i)$ . Let the total degree of  $H_J$  be  $|J| = \sum_{i=1}^d j_i$ . Given a function  $f \in \mathcal{L}^2(\mathbb{R}^d, \mathcal{N}_d)$ , we can express it uniquely as  $f(\mathbf{x}) = \sum_{J \in \mathbb{N}^d} \hat{f}(J) H_J(\mathbf{x})$ , where  $\hat{f}(J) = \mathbf{E}_{\mathbf{x} \sim \mathcal{N}_d}[f(\mathbf{x}) H_J(\mathbf{x})]$ . We denote by  $f^{[k]}(\mathbf{x})$  the degree  $k$  part of the Hermite expansion of  $f$ , i.e.,  $f^{[k]}(\mathbf{x}) = \sum_{|J|=k} \hat{f}(J) H_J(\mathbf{x})$ .

**Definition A.1.** We say that a polynomial  $q$  in  $d$  variables is harmonic of degree  $k$  if it is a linear combination of degree  $k$  Hermite polynomials. That is,  $q$  is harmonic if it can be written as

$$q(\mathbf{x}) = q^{[k]}(\mathbf{x}) = \sum_{J: |J|=k} c_J H_J(\mathbf{x}).$$

Notice that, since for a single-dimensional Hermite polynomial it holds  $h'_m(x) = \sqrt{m} h_{m-1}(x)$ , we have that  $\nabla H_M^{(i)}(\mathbf{x}) = \sqrt{m_i} H_{M-E_i}(\mathbf{x})$ , where  $M = (m_1, \dots, m_d)$ . From this fact and the orthogonality of Hermite polynomials, we obtain

$$\mathbf{E}_{\mathbf{x} \sim \mathcal{N}_d}[\langle \nabla H_M(\mathbf{x}), \nabla H_L(\mathbf{x}) \rangle] = |M| \mathbb{I}[M = L].$$

We will also require the following standard facts:

**Fact A.2.** Let  $p$  be a polynomial of degree  $k$  in  $d$  variables. Then  $p$  is harmonic of degree  $k$  if and only if for all  $\mathbf{x} \in \mathbb{R}^d$  it holds that  $k p(\mathbf{x}) = \langle \mathbf{x}, \nabla p(\mathbf{x}) \rangle - \nabla^2 p(\mathbf{x})$ .

**Fact A.3** (see, e.g., [DKPZ21]). Let  $p, q$  be harmonic polynomials of degree  $k$ . Then,

$$\mathbf{E}_{\mathbf{x} \sim \mathcal{N}_d}[\langle \nabla^\ell p(\mathbf{x}), \nabla^\ell q(\mathbf{x}) \rangle] = k(k-1) \dots (k-\ell+1) \mathbf{E}_{\mathbf{x} \sim \mathcal{N}_d}[p(\mathbf{x}) q(\mathbf{x})].$$

In particular,

$$\langle \nabla^k p(\mathbf{x}), \nabla^k q(\mathbf{x}) \rangle = k! \mathbf{E}_{\mathbf{x} \sim \mathcal{N}_d}[p(\mathbf{x}) q(\mathbf{x})].$$

### B Omitted Proofs from Section 3

#### B.1 Proof of Lemma 3.5

We start with the following claim:

**Claim B.1.** Let  $p : \mathbb{R}^{n_1} \rightarrow \mathbb{R}$  and  $q : \mathbb{R}^{n_2} \rightarrow \mathbb{R}$ , where  $p$  is a polynomial of degree at most  $k$  and  $q \in \mathcal{L}^2(\mathbb{R}^{n_2}, \mathcal{N}_{n_2})$ . Let  $\mathbf{U} \in \mathbb{R}^{n_1 \times n}$ ,  $\mathbf{V} \in \mathbb{R}^{n_2 \times n}$  such that  $\mathbf{U}\mathbf{U}^\top = \mathbf{I}_{n_1}$ ,  $\mathbf{V}\mathbf{V}^\top = \mathbf{I}_{n_2}$ . Then, we have that  $\mathbf{E}_{\mathbf{x} \sim \mathcal{N}_n}[p(\mathbf{U}\mathbf{x})q(\mathbf{V}\mathbf{x})] = \sum_{m=0}^k \frac{1}{m!} \langle (\mathbf{U}^\top)^{\otimes m} \mathbf{R}_1^m, (\mathbf{V}^\top)^{\otimes m} \mathbf{R}_2^m \rangle$ , where  $\mathbf{R}_1^m = \nabla^m p^{[m]}(\mathbf{x})$ ,  $\mathbf{R}_2^m = \nabla^m q^{[m]}(\mathbf{x})$ .

We require the following lemma:

**Lemma B.2.** Let  $p$  be a harmonic polynomial of degree  $k$ . Let  $\mathbf{V} \in \mathbb{R}^{m \times n}$  with  $\mathbf{V}\mathbf{V}^\top = \mathbf{I}_m$ . Then the polynomial  $p(\mathbf{V}\mathbf{x})$  is harmonic of degree  $k$ .

*Proof.* Let  $f(\mathbf{x}) = p(\mathbf{V}\mathbf{x})$ . By Fact A.2, it suffices to show that for all  $\mathbf{x} \in \mathbb{R}^n$  it holds that  $kf(\mathbf{x}) = \langle \mathbf{x}, \nabla f(\mathbf{x}) \rangle - \nabla^2 f(\mathbf{x})$ . Since  $\mathbf{V}\mathbf{V}^\top = \mathbf{I}_m$ , applying Fact A.2 yields

$$\langle \mathbf{x}, \nabla f(\mathbf{x}) \rangle - \nabla^2 f(\mathbf{x}) = \langle \mathbf{V}\mathbf{x}, \nabla p(\mathbf{V}\mathbf{x}) \rangle - \nabla^2 p(\mathbf{V}\mathbf{x}) = kp(\mathbf{V}\mathbf{x}) = kf(\mathbf{x}).$$

□

*Proof of Claim B.1.* For  $m \in \mathbb{N}$ , let  $f^{(m)}(\mathbf{x}) = p^{[m]}(\mathbf{U}\mathbf{x})$  and  $g^{(m)}(\mathbf{x}) = q^{[m]}(\mathbf{V}\mathbf{x})$ . We can write  $p(\mathbf{U}\mathbf{x}) \sim \sum_{m=0}^k f^{(m)}(\mathbf{x})$  and  $q(\mathbf{V}\mathbf{x}) \sim \sum_{m=0}^\infty g^{(m)}(\mathbf{x})$ . Then applying Fact A.3 and Lemma B.2 yields

$$\begin{aligned} \mathbf{E}_{\mathbf{x} \sim \mathcal{N}_n} [p(\mathbf{U}\mathbf{x})q(\mathbf{V}\mathbf{x})] &= \sum_{m_1=0}^k \sum_{m_2=0}^\infty \mathbf{E}_{\mathbf{x} \sim \mathcal{N}_n} [f^{(m_1)}(\mathbf{x})g^{(m_2)}(\mathbf{x})] = \sum_{m=0}^k \mathbf{E}_{\mathbf{x} \sim \mathcal{N}_n} [f^{(m)}(\mathbf{x})g^{(m)}(\mathbf{x})] \\ &= \sum_{m=0}^k \frac{1}{m!} \langle \nabla^m f^{(m)}(\mathbf{x}), \nabla^m g^{(m)}(\mathbf{x}) \rangle = \sum_{m=0}^k \frac{1}{m!} \langle \nabla^m p^{[m]}(\mathbf{U}\mathbf{x}), \nabla^m q^{[m]}(\mathbf{V}\mathbf{x}) \rangle. \end{aligned}$$

Denote by  $\mathcal{U} \subseteq \mathbb{R}^n$  the image of the linear map  $\mathbf{U}^\top$ . Applying the chain rule, for any function  $h(\mathbf{U}\mathbf{x}) : \mathbb{R}^n \rightarrow \mathbb{R}$ , it holds  $\nabla h(\mathbf{U}\mathbf{x}) = \partial_i h(\mathbf{U}\mathbf{x}) U_{ij} \in \mathcal{U}$ , where we applied Einstein's summation notation for repeated indices. Applying the above rule  $m$  times, we have that

$$\nabla^m h(\mathbf{U}\mathbf{x}) = \partial_{i_m} \dots \partial_{i_1} h(\mathbf{U}\mathbf{x}) U_{i_1, j_1} \dots U_{i_m, j_m} \in \mathcal{U}^{\otimes m}.$$

Moreover, denote  $\mathbf{S}_m = \nabla^m p^{[m]}(\mathbf{U}\mathbf{x}) = (\mathbf{U}^\top)^{\otimes m} \mathbf{R}_1^m \in \mathcal{U}^{\otimes m}$ , and  $\mathbf{T}_m = \nabla^m q^{[m]}(\mathbf{V}\mathbf{x}) = (\mathbf{V}^\top)^{\otimes m} \mathbf{R}_2^m \in \mathcal{V}^{\otimes m}$ . We have that

$$\begin{aligned} \mathbf{E}_{\mathbf{x} \sim \mathcal{N}_n} [f(\mathbf{x})g(\mathbf{x})] &= \sum_{m=0}^k \frac{1}{m!} \langle \nabla^m p^{[m]}(\mathbf{U}\mathbf{x}), \nabla^m q^{[m]}(\mathbf{V}\mathbf{x}) \rangle = \sum_{m=0}^k \frac{1}{m!} \langle \mathbf{S}_m, \mathbf{T}_m \rangle \\ &= \sum_{m=0}^k \frac{1}{m!} \langle (\mathbf{U}^\top)^{\otimes m} \mathbf{R}_1^m, (\mathbf{V}^\top)^{\otimes m} \mathbf{R}_2^m \rangle. \end{aligned}$$

This proves the claim. □

*Proof of Lemma 3.5.* Applying Claim B.1 by taking  $\mathbf{U} = \mathbf{I}_m$  and  $\mathbf{V} = \mathbf{v}^\top$ , we have that

$$\mathbf{E}_{\mathbf{z} \sim \mathcal{N}_m} [p(\mathbf{z})f(\mathbf{v}^\top \mathbf{z})] = \sum_{d=0}^{k-1} \frac{1}{d!} \langle \mathbf{R}_1^d, \mathbf{v}^{\otimes d} \mathbf{R}_2^d \rangle,$$

which is a polynomial in  $\mathbf{v}$  of degree less than  $k$ , since  $\mathbf{R}_1^d = \nabla^d p^{[d]}(\mathbf{x})$  and  $\mathbf{R}_2^d = \nabla^d f^{[d]}(\mathbf{x})$  are constants only depending on  $p$  and  $f$ . This completes the proof of Lemma 3.5. □

## B.2 Proof of Lemma 3.6

We start by proving that “there exist non-negative weights  $w_1, \dots, w_r$  with  $\sum_{\ell=1}^r w_\ell = 1$  such that  $\sum_{\ell=1}^r w_\ell q(\mathbf{v}_\ell) = 0$  for all odd polynomials  $q$  of degree less than  $k$ ” implies “there does not exist any odd polynomial  $q$  of degree less than  $k$  such that  $q(\mathbf{v}_\ell) > 0, 1 \leq \ell \leq r$ .” Suppose for contradiction that there exists an odd polynomial  $q^*$  of degree less than  $k$  such that  $q^*(\mathbf{v}_\ell) > 0, 1 \leq \ell \leq r$ . For arbitrary non-negative weights  $w_1, \dots, w_r$  with  $\sum_{\ell=1}^r w_\ell = 1$ , we have that  $\sum_{\ell=1}^r w_\ell q^*(\mathbf{v}_\ell) \geq \min\{q^*(\mathbf{v}_1), \dots, q^*(\mathbf{v}_r)\} > 0$ , which contradicts to the first statement.

We then prove the opposite direction. We will use the following version of Farkas' lemma.

**Fact B.3** (Farkas' lemma). *Let  $A \in \mathbb{R}^{m \times n}$  and  $b \in \mathbb{R}^m$ . Then exactly one of the following two assertions is true:*

- There exists an  $\mathbf{x} \in \mathbb{R}^n$  such that  $A\mathbf{x} = b$  and  $\mathbf{x} \geq 0$ .
- There exists a  $\mathbf{y} \in \mathbb{R}^m$  such that  $\mathbf{y}^\top A \geq 0$  and  $\mathbf{y}^\top b < 0$ .

Suppose for contradiction that there does not exist  $w_1, \dots, w_r$  with  $\sum_{\ell=1}^r w_\ell = 1$  such that  $\sum_{\ell=1}^r w_\ell q(\mathbf{v}_\ell) = 0$  holds for every odd polynomial  $q$  of degree less than  $k$ . Let  $s_{k,m}$  denote the total number of  $m$ -variate odd monomials of degree less than  $k$ , and  $\{q_j^{k,m}\}_{1 \leq j \leq s_{k,m}}$  denote such monomials. We consider the following LP with variables  $\mathbf{w} = (w_1, \dots, w_r)^\top$ :  $\sum_{\ell=1}^r w_\ell q_j^{k,m}(\mathbf{v}_\ell) = 0, 1 \leq j \leq s_{k,m}, \sum_{\ell=1}^r w_\ell = 1, w_\ell \geq 0, 1 \leq \ell \leq r$ . By our assumption, the LP is infeasible. In order to applying the Farkas Lemma (Fact B.3), we write the linear system as  $\mathbf{A}\mathbf{w} = \mathbf{b}$ , where

$$\mathbf{A} = \begin{bmatrix} 1 & 1 & \cdots & 1 \\ q_1^{k,m}(\mathbf{v}_1) & q_1^{k,m}(\mathbf{v}_2) & \cdots & q_1^{k,m}(\mathbf{v}_r) \\ \vdots & \vdots & \ddots & \vdots \\ q_{s_{k,m}}^{k,m}(\mathbf{v}_1) & q_{s_{k,m}}^{k,m}(\mathbf{v}_2) & \cdots & q_{s_{k,m}}^{k,m}(\mathbf{v}_r) \end{bmatrix}, \mathbf{w} = \begin{bmatrix} w_1 \\ w_2 \\ \vdots \\ w_r \end{bmatrix}, \mathbf{b} = \begin{bmatrix} 1 \\ 0 \\ \vdots \\ 0 \end{bmatrix}.$$

By Fact B.3, the original linear system is infeasible if and only if there exists a vector  $\mathbf{u} = [u_0, u_1, \dots, u_{s_{k,m}}]^\top$ ,  $\mathbf{u}^\top \mathbf{A} \geq 0$  and  $\mathbf{u}^\top \mathbf{b} < 0$ , which is equivalent to  $u_0 + \sum_{j=1}^{s_{k,m}} u_j q_j^{k,m}(\mathbf{v}_\ell) \geq 0, \forall 1 \leq \ell \leq r$  and  $u_0 < 0$ . Let  $q^*(\mathbf{v}) = \sum_{j=1}^{s_{k,m}} u_j q_j^{k,m}(\mathbf{v}), \mathbf{v} \in \mathbb{R}^m$ , which is an odd polynomial of degree less than  $k$ . By our definition of  $q^*$ , we have that  $q^*(\mathbf{v}_\ell) = \sum_{j=1}^{s_{k,m}} u_j q_j^{k,m}(\mathbf{v}_\ell) \geq -u_0 > 0, \forall 1 \leq \ell \leq r$ , which contradicts to our assumption that *there does not exist any odd polynomial  $q$  of degree less than  $k$  such that  $q(\mathbf{v}_\ell) > 0, \forall 1 \leq \ell \leq r$* . This completes the proof.

### B.3 Proof of Claim 3.7

We denote by  $G(\mathbf{x})$  to be the standard Gaussian density. By definition, we have that

$$\begin{aligned} d_{\text{TV}}(D_{\mathbf{U}}, D_0) &= (1/2) \int_{\mathbf{x} \in \mathbb{R}^n} \sum_{y \in \{\pm 1\}} |D_{\mathbf{U}}(\mathbf{x}, y) - D_0(\mathbf{x}, y)| d\mathbf{x} \\ &= (1/2) \int_{\mathbf{x} \in \mathbb{R}^n} G(\mathbf{x}) \sum_{y \in \{\pm 1\}} \left| \sum_{\ell=1}^r w_\ell \mathbb{I}[\text{sign}(\mathbf{v}_\ell^\top \mathbf{U}\mathbf{x}) = y] - (1/2) \right| d\mathbf{x} \\ &= (1/2) \mathbf{E}_{\mathbf{x} \sim \mathcal{N}_n} \left[ \sum_{y \in \{\pm 1\}} \left| \sum_{\ell=1}^r w_\ell \mathbb{I}[\text{sign}(\mathbf{v}_\ell^\top \mathbf{U}\mathbf{x}) = y] - (1/2) \right| \right] \\ &= (1/2) \sum_{y \in \{\pm 1\}} \mathbf{E}_{\mathbf{x} \sim \mathcal{N}_n} \left[ \left| \sum_{\ell=1}^r w_\ell \mathbb{I}[\text{sign}(\mathbf{v}_\ell^\top \mathbf{U}\mathbf{x}) = y] - (1/2) \right| \right]. \end{aligned}$$

Therefore, it suffices to show that

$$\mathbf{E}_{\mathbf{x} \sim \mathcal{N}_n} \left[ \left| \sum_{\ell=1}^r w_\ell \mathbb{I}[\text{sign}(\mathbf{v}_\ell^\top \mathbf{U}\mathbf{x}) = y] - (1/2) \right| \right] \geq \Omega(\Delta/r), \quad \forall y \in \{\pm 1\}.$$

We assume that  $w_{\ell_0} \geq 1/r$  for some  $\ell_0 \in [r]$ . Let  $\mathbf{v}^*$  be an arbitrary vector satisfying  $\mathbf{v}_{\ell_0}^\top \mathbf{v}^* = 0$ . We denote by

$$\begin{aligned} \mathcal{X}_1 &= \{\mathbf{x} \in \mathbb{R}^m \mid \text{sign}(\mathbf{v}_{\ell_0}^\top \mathbf{x}) > 0, \text{sign}(\mathbf{v}_\ell^\top \mathbf{x}) = \text{sign}(\mathbf{v}_\ell^\top \mathbf{v}^*), \ell \in [r] \setminus \{\ell_0\}\}, \\ \mathcal{X}_2 &= \{\mathbf{x} \in \mathbb{R}^m \mid \text{sign}(\mathbf{v}_{\ell_0}^\top \mathbf{x}) < 0, \text{sign}(\mathbf{v}_\ell^\top \mathbf{x}) = \text{sign}(\mathbf{v}_\ell^\top \mathbf{v}^*), \ell \in [r] \setminus \{\ell_0\}\}. \end{aligned}$$

Roughly speaking,  $\mathcal{X}_1$  and  $\mathcal{X}_2$  denote the subsets of vectors which are very close to the boundary of the halfspace with direction  $\mathbf{v}_{\ell_0}$  and maintain the same label with the boundary for the other halfspaces. By definition, for any  $\mathbf{x}_1 \in \mathcal{X}_1, \mathbf{x}_2 \in \mathcal{X}_2$ , we have that

$$\left| \sum_{\ell=1}^r w_\ell \mathbb{I}[\text{sign}(\mathbf{v}_\ell^\top \mathbf{x}_1) = y] - \sum_{\ell=1}^r w_\ell \mathbb{I}[\text{sign}(\mathbf{v}_\ell^\top \mathbf{x}_2) = y] \right| = w_{\ell_0} \geq 1/r.$$

Therefore, we have either

$$\left| \sum_{\ell=1}^r w_\ell \mathbb{I}[\text{sign}(\mathbf{v}_\ell^\top \mathbf{x}_1) = y] - (1/2) \right| \geq 1/2r, \quad \forall \mathbf{x}_1 \in \mathcal{X}_1,$$

or

$$\left| \sum_{\ell=1}^r w_{\ell} \mathbb{I}[\text{sign}(\mathbf{v}_{\ell}^{\top} \mathbf{x}_2) = y] - (1/2) \right| \geq 1/2r, \quad \forall \mathbf{x}_2 \in \mathcal{X}_2.$$

Since  $\mathbf{U}\mathbf{x}$  is a standard Gaussian for any  $\mathbf{U}\mathbf{U}^{\top} = \mathbf{I}_m$  and  $\|\mathbf{v}_i + \mathbf{v}_j\|_2, \|\mathbf{v}_i - \mathbf{v}_j\|_2 \geq \Omega(\Delta), 1 \leq i < j \leq r$ , we have that for  $y \in \{\pm 1\}$ ,

$$\begin{aligned} & \mathbf{E}_{\mathbf{x} \sim \mathcal{N}_n} \left[ \left| \sum_{\ell=1}^r w_{\ell} \mathbb{I}[\text{sign}(\mathbf{v}_{\ell}^{\top} \mathbf{U}\mathbf{x}) = y] - (1/2) \right| \right] \\ & \geq \mathbf{Pr}_{\mathbf{x} \sim \mathcal{N}_n}[\mathbf{U}\mathbf{x} \in \mathcal{X}_1] \cdot \mathbf{E}_{\mathbf{x} \sim \mathcal{N}_n} \left[ \left| \sum_{\ell=1}^r w_{\ell} \mathbb{I}[\text{sign}(\mathbf{v}_{\ell}^{\top} \mathbf{U}\mathbf{x}) = y] - (1/2) \right| \mid \mathbf{U}\mathbf{x} \in \mathcal{X}_1 \right] \\ & \quad + \mathbf{Pr}_{\mathbf{x} \sim \mathcal{N}_n}[\mathbf{U}\mathbf{x} \in \mathcal{X}_2] \cdot \mathbf{E}_{\mathbf{x} \sim \mathcal{N}_n} \left[ \left| \sum_{\ell=1}^r w_{\ell} \mathbb{I}[\text{sign}(\mathbf{v}_{\ell}^{\top} \mathbf{U}\mathbf{x}) = y] - (1/2) \right| \mid \mathbf{U}\mathbf{x} \in \mathcal{X}_2 \right] \\ & \geq \Omega(\Delta/r). \end{aligned}$$

## C Omitted Proofs from Section 4

### C.1 Proof of Lemma 4.5

In this section, we prove Lemma 4.5. We start by introducing the following technical results.

**Fact C.1.** *Let  $t \geq 2$  and  $p, q \in \mathcal{P}_t^d$ . Then, we have that*

$$t \int_{\|\mathbf{x}\|_2=1} p(\mathbf{x})q(\mathbf{x})d\mathbf{x} = \frac{1}{d+2t-2} \int_{\|\mathbf{x}\|_2=1} \langle \nabla p(\mathbf{x}), \nabla q(\mathbf{x}) \rangle d\mathbf{x} + \frac{1}{d+2t-2} \int_{\|\mathbf{x}\|_2=1} p(\mathbf{x})\nabla^2 q(\mathbf{x})d\mathbf{x}.$$

*Proof of Fact C.1.* Applying the Gaussian Divergence theorem for the function  $p(\mathbf{x})\nabla p(\mathbf{x})$  over the unit ball, we have that

$$\begin{aligned} & t \int_{\|\mathbf{x}\|_2=1} p(\mathbf{x})q(\mathbf{x})d\mathbf{x} = \int_{\|\mathbf{x}\|_2=1} \langle p(\mathbf{x})\nabla q(\mathbf{x}), \mathbf{x} \rangle d\mathbf{x} = \int_{\|\mathbf{x}\|_2 \leq 1} \nabla \cdot (p(\mathbf{x})\nabla q(\mathbf{x}))d\mathbf{x} \\ & = \int_{\|\mathbf{x}\|_2 \leq 1} \langle \nabla p(\mathbf{x}), \nabla q(\mathbf{x}) \rangle d\mathbf{x} + \int_{\|\mathbf{x}\|_2 \leq 1} p(\mathbf{x})\nabla^2 q(\mathbf{x})d\mathbf{x} \\ & = \int_0^1 r^{d-1}dr \int_{\|\mathbf{x}\|_2=1} \langle \nabla p(r\mathbf{x}), \nabla q(r\mathbf{x}) \rangle d\mathbf{x} + \int_0^1 r^{d-1}dr \int_{\|\mathbf{x}\|_2=1} p(r\mathbf{x})\nabla^2 q(r\mathbf{x})d\mathbf{x} \\ & = \int_0^1 r^{2t+d-3}dr \int_{\|\mathbf{x}\|_2=1} \langle \nabla p(\mathbf{x}), \nabla q(\mathbf{x}) \rangle d\mathbf{x} + \int_0^1 r^{2t+d-3}dr \int_{\|\mathbf{x}\|_2=1} p(\mathbf{x})\nabla^2 q(\mathbf{x})d\mathbf{x} \\ & = \frac{1}{d+2t-2} \int_{\|\mathbf{x}\|_2=1} \langle \nabla p(\mathbf{x}), \nabla q(\mathbf{x}) \rangle d\mathbf{x} + \frac{1}{d+2t-2} \int_{\|\mathbf{x}\|_2=1} p(\mathbf{x})\nabla^2 q(\mathbf{x})d\mathbf{x}. \end{aligned}$$

This completes the proof.  $\square$

**Fact C.2** (see, e.g., Lemma 28 in [Kan15]). *For any  $p \in \Omega_t^d$ , we have that*

$$\sup_{\|\mathbf{x}\|_2=1} |p(\mathbf{x})| \leq \sqrt{N_{t,d}} \sqrt{\mathbf{E}[p(\mathbf{x})^2]} = \sqrt{N_{t,d}} \|p\|_2.$$

The following lemma provides upper and lower bounds for the expectation of the  $L^2$ -norm square of the gradient of any homogeneous polynomial  $p \in \Omega_t^d$  over the unit sphere  $\mathbb{S}^{d-1}$ .

**Lemma C.3.** *Let  $t$  be an odd positive integer. For any  $p \in \mathcal{P}_t^d$ , we have that  $\mathbf{E}[\|\nabla p(\mathbf{x})\|_2^2] \geq (d-1)\|p\|_2^2$  and  $\mathbf{E}[\|\nabla p(\mathbf{x})\|_2^2] \leq t(d+2t-2)\|p\|_2^2$ .*

*Proof.* By Fact C.1, we have that

$$t(d+2t-2)\|p\|_2^2 = \mathbf{E}[\|\nabla p(\mathbf{x})\|_2^2] + \mathbf{E}[p(\mathbf{x})\nabla^2 p(\mathbf{x})].$$

We bound  $\mathbf{E}[p(\mathbf{x})\nabla^2 p(\mathbf{x})]$  as follows. We consider the linear transformations  $\mathcal{A}_t : \mathcal{P}_t^d \rightarrow \mathcal{P}_{t+2}^d, \mathcal{B}_t : \mathcal{P}_t^d \rightarrow \mathcal{P}_{t-2}^d$  as follows:  $\mathcal{A}_t(p) = \mathbf{x}^\top \mathbf{x} p(\mathbf{x}), \mathcal{B}_t(p) = \nabla^2 p(\mathbf{x}), p \in \mathcal{P}_t^d$ . We first show that for any  $t \geq 2$ , both  $\mathcal{A}_{t-2}\mathcal{B}_t$  and  $\mathcal{B}_{t+2}\mathcal{A}_t$  are symmetric. For any  $p, q \in \mathcal{P}_t^d$ , applying Fact C.1 yields

$$\begin{aligned} \langle \mathcal{A}_{t-2}\mathcal{B}_t p, q \rangle &= \langle \mathcal{B}_{t+2}\mathcal{A}_t p, q \rangle = \mathbf{E}[\nabla^2 p(\mathbf{x})q(\mathbf{x})] \\ &= t(d+2t-2)\mathbf{E}[p(\mathbf{x})q(\mathbf{x})] - \mathbf{E}[\langle \nabla p(\mathbf{x}), \nabla q(\mathbf{x}) \rangle] \\ &= \mathbf{E}[\nabla^2 q(\mathbf{x})p(\mathbf{x})] = \langle \mathcal{A}_{t-2}\mathcal{B}_t q, p \rangle = \langle \mathcal{B}_{t+2}\mathcal{A}_t q, p \rangle. \end{aligned}$$

Therefore, by the eigendecomposition of symmetric linear transformations, we have that  $\lambda_1 \|p\|_2^2 \leq \langle \mathcal{A}_{t-2}\mathcal{B}_t p, p \rangle = \mathbf{E}[p(\mathbf{x})\nabla^2 p(\mathbf{x})] \leq \lambda_t \|p\|_2^2, \forall p \in \Omega_t^d$ , where  $\lambda_1 \leq \dots \leq \lambda_t$  denote the eigenvalues of  $\mathcal{A}_{t-2}\mathcal{B}_t$ . In addition, by elementary calculation, for any  $p \in \mathcal{P}_t^d$ ,

$$\begin{aligned} \mathcal{B}_{t+2}\mathcal{A}_t p &= \nabla^2 \mathbf{x}^\top \mathbf{x} p(\mathbf{x}) = \nabla \cdot (2p(\mathbf{x})\mathbf{x} + \mathbf{x}^\top \mathbf{x} \nabla p(\mathbf{x})) = \sum_{i=1}^d \frac{\partial(2p(\mathbf{x})x_i + \mathbf{x}^\top \mathbf{x}(\nabla p(\mathbf{x}))_i)}{\partial x_i} \\ &= 2dp(\mathbf{x}) + 4\langle \mathbf{x}, \nabla p(\mathbf{x}) \rangle + \mathbf{x}^\top \mathbf{x} \nabla^2 p(\mathbf{x}) = (\mathcal{A}_{t-2}\mathcal{B}_t + 2d + 4t)p. \end{aligned}$$

If  $\mathcal{A}_{t-2}\mathcal{B}_t$  has an eigenvector  $p^*$  corresponding to some eigenvalue  $\lambda^*$ , then  $(\mathcal{A}_t\mathcal{B}_{t+2})(\mathcal{A}_t p^*) = \mathcal{A}_t\mathcal{A}_{t-2}\mathcal{B}_t p^* + (2d+4t)\mathcal{A}_t p^* = (\lambda^* + 2d+4t)\mathcal{A}_t p^*$ , which implies that  $\mathcal{A}_t p^*$  is an eigenvector of  $\mathcal{A}_t\mathcal{B}_{t+2}$  corresponding to the eigenvalue  $\lambda^* + 2d+4t$ . Note that since  $\mathcal{B}_{t+2}$  maps  $\mathcal{P}_{t+2}^d$  to  $\mathcal{P}_t^d$ , we have that  $\ker(\mathcal{B}_{t+2}) \geq N_{t+2,d} - N_{t,d}$ , which implies that  $\mathcal{A}_t\mathcal{B}_{t+2}$  has eigenvalue 0 with multiplicity at least  $N_{t+2,d} - N_{t,d}$ . Therefore, the eigenvalues of  $\mathcal{A}_t\mathcal{B}_{t+2}$  are  $0 < \lambda_1 + 2d+4t \leq \dots \leq \lambda_t + 2d+4t$ , where the multiplicity of eigenvalue 0 is  $N_{t+2,d} - N_{t,d}$  and the multiplicity of eigenvalue  $\lambda_i + 2d+4t$  is the same as the multiplicity of eigenvalue  $\lambda_i$  of  $\mathcal{A}_{t-2}\mathcal{B}_t$ . Therefore, we have that  $\lambda_1 = 0$  and  $\lambda_t = (t-1)(d+t-1)$ , which implies that

$$\mathbf{E}[\|\nabla p(\mathbf{x})\|_2^2] = t(d+2t-2)\|p\|_2^2 - \mathbf{E}[p(\mathbf{x})\nabla^2 p(\mathbf{x})] \in [(t^2+d-1)\|p\|_2^2, t(d+2t-2)\|p\|_2^2].$$

Therefore, we have that  $\mathbf{E}[\|\nabla p(\mathbf{x})\|_2^2] = \mathbf{E}[\|\nabla p(\mathbf{x})\|_2^2 - \langle \mathbf{x}, \nabla p(\mathbf{x}) \rangle^2] = \mathbf{E}[\|\nabla p(\mathbf{x})\|_2^2] - t^2\|p\|_2^2 \geq (d-1)\|p\|_2^2$ , completing the proof.  $\square$

We need the following technical lemma which provides a universal upper bound for the  $L_2^2$ -norm of the gradient of any homogeneous polynomial  $p \in \Omega_t^d$ .

**Lemma C.4.** *For any  $p \in \Omega_t^d$  and any  $1 \leq j \leq t$ , we have that*

$$\sup_{\|\mathbf{x}\|_2=1} \left\| \frac{\partial^j p(\mathbf{y})}{\partial \mathbf{y}^j} \right\|_2^2 \leq t^j (d+2t-2)^j N_{2(t-j),d} \|p\|_2^2.$$

*Proof.* Note that  $\|\nabla p(\mathbf{x})\|_2^2 \in \Omega_{2(t-1)}^d$ , by Fact C.2, we have that

$$\sup_{\|\mathbf{x}\|_2=1} \|\nabla p(\mathbf{x})\|_2^2 \leq \sqrt{N_{2(t-1),d}} \sqrt{\mathbf{E}[\|\nabla p(\mathbf{x})\|_2^4]} \leq \sqrt{N_{2(t-1),d}} \sqrt{\mathbf{E}[\|\nabla p(\mathbf{x})\|_2^2]} \sqrt{\sup_{\|\mathbf{x}\|_2=1} \|\nabla p(\mathbf{x})\|_2^2},$$

which implies that  $\sup_{\|\mathbf{x}\|_2=1} \|\nabla p(\mathbf{x})\|_2^2 \leq N_{2(t-1),d} \mathbf{E}[\|\nabla p(\mathbf{x})\|_2^2] \leq t(d+2t-2)N_{2(t-1),d} \|p\|_2^2$ .

Since  $\left\| \frac{\partial^j p(\mathbf{x})}{\partial \mathbf{x}^j} \right\|_2^2 \leq \left\| \frac{\partial^j p(\mathbf{x})}{\partial \mathbf{x}^j} \right\|_F^2$ , it suffices to obtain an upper bound for  $\sup_{\|\mathbf{x}\|_2=1} \left\| \frac{\partial^j p(\mathbf{x})}{\partial \mathbf{x}^j} \right\|_F^2$ .

Noting that  $\left\| \frac{\partial^j p(\mathbf{x})}{\partial \mathbf{x}^j} \right\|_F^2 \in \Omega_{2(t-j)}^d$ , by Fact C.2, we have that

$$\begin{aligned} \sup_{\|\mathbf{x}\|_2=1} \left\| \frac{\partial^j p(\mathbf{x})}{\partial \mathbf{x}^j} \right\|_F^2 &\leq \sqrt{N_{2(t-j),d}} \sqrt{\mathbf{E} \left[ \left\| \frac{\partial^j p(\mathbf{x})}{\partial \mathbf{x}^j} \right\|_F^4 \right]} \\ &\leq \sqrt{N_{2(t-j),d}} \sqrt{\mathbf{E} \left[ \left\| \frac{\partial^j p(\mathbf{x})}{\partial \mathbf{x}^j} \right\|_F^2 \right]} \sqrt{\sup_{\|\mathbf{x}\|_2=1} \left\| \frac{\partial^j p(\mathbf{x})}{\partial \mathbf{x}^j} \right\|_F^2}, \end{aligned}$$

which implies that  $\sup_{\mathbf{x} \in \mathbb{S}^{d-1}} \left\| \frac{\partial^j p(\mathbf{x})}{\partial \mathbf{x}^j} \right\|_F^2 \leq N_{2(t-j),d} \mathbf{E} \left[ \left\| \frac{\partial^j p(\mathbf{x})}{\partial \mathbf{x}^j} \right\|_F^2 \right]$ . Noting that  $\frac{\partial p(\mathbf{x})}{\partial x_i} \in \Omega_{t-1}^d$ , by Lemma C.3, we have that

$$\begin{aligned} \mathbf{E} \left[ \left\| \frac{\partial^2 p(\mathbf{x})}{\partial \mathbf{x}^2} \right\|_F^2 \right] &= \mathbf{E} \left[ \sum_{i_1, i_2 \in [d]} \left( \frac{\partial^2 p(\mathbf{x})}{\partial x_{i_1} \partial x_{i_2}} \right)^2 \right] = \sum_{i_1=1}^d \mathbf{E} \left[ \sum_{i_2=1}^d \left( \frac{\partial}{\partial x_{i_2}} \left( \frac{\partial p(\mathbf{x})}{\partial x_{i_1}} \right) \right)^2 \right] \\ &\leq (t-1)(d+2t-4) \sum_{i_1=1}^d \mathbf{E} \left[ \left( \frac{\partial p(\mathbf{x})}{\partial x_{i_1}} \right)^2 \right] \leq t(d+2t-2) \mathbf{E} [\|\nabla p(\mathbf{x})\|_2^2] \leq t^2(d+2t-2)^2 \|p\|_2^2. \end{aligned}$$

In general, noting that  $\frac{\partial^{j-1} p(\mathbf{x})}{\partial x_{i_1} \dots \partial x_{i_{j-1}}} \in \Omega_{t-j+1}^d$ , by Lemma C.3, we have that

$$\begin{aligned} \mathbf{E} \left[ \left\| \frac{\partial^j p(\mathbf{x})}{\partial \mathbf{x}^j} \right\|_F^2 \right] &= \mathbf{E} \left[ \sum_{i_1, \dots, i_j \in [d]} \left( \frac{\partial^j p(\mathbf{x})}{\partial x_{i_1} \dots \partial x_{i_j}} \right)^2 \right] \\ &= \sum_{i_1, \dots, i_{j-1} \in [d]} \mathbf{E} \left[ \sum_{i_j=1}^d \left( \frac{\partial}{\partial x_{i_j}} \left( \frac{\partial^{j-1} p(\mathbf{x})}{\partial x_{i_1} \dots \partial x_{i_{j-1}}} \right) \right)^2 \right] \\ &\leq (t-j+1)(d+2(t-j)) \sum_{i_1, \dots, i_{j-1} \in [d]} \mathbf{E} \left[ \left( \frac{\partial^{j-1} p(\mathbf{x})}{\partial x_{i_1} \dots \partial x_{i_{j-1}}} \right)^2 \right] \\ &\leq t(d+2t-2) \mathbf{E} \left[ \left\| \frac{\partial^{j-1} p(\mathbf{x})}{\partial \mathbf{x}^{j-1}} \right\|_F^2 \right] \leq t^j (d+2t-2)^j \|p\|_2^2. \end{aligned}$$

Therefore, we have that

$$\sup_{\|\mathbf{x}\|_2=1} \left\| \frac{\partial^j p(\mathbf{x})}{\partial \mathbf{x}^j} \right\|_F^2 \leq N_{2(t-j),d} \mathbf{E} \left[ \left\| \frac{\partial^j p(\mathbf{x})}{\partial \mathbf{x}^j} \right\|_F^2 \right] \leq t^j (d+2t-2)^j N_{2(t-j),d} \|p\|_2^2.$$

This completes the proof.  $\square$

*Proof of Lemma 4.5.* By definition of  $\nabla_o p(\mathbf{y})$ , we have that

$$\begin{aligned} p(\mathbf{z}) - p(\mathbf{y}) &= \frac{p(\mathbf{y} + \delta \cdot \nabla_o p(\mathbf{y}))}{\|\mathbf{y} + \delta \cdot \nabla_o p(\mathbf{y})\|_2^t} - p(\mathbf{y}) \\ &= \frac{p(\mathbf{y} + \delta \cdot \nabla_o p(\mathbf{y})) - p(\mathbf{y})}{(1 + \delta^2 \|\nabla_o p(\mathbf{y})\|_2^2)^{t/2}} - \left( 1 - \frac{1}{(1 + \delta^2 \|\nabla_o p(\mathbf{y})\|_2^2)^{t/2}} \right) p(\mathbf{y}) \\ &\geq \frac{p(\mathbf{y} + \delta \cdot \nabla_o p(\mathbf{y})) - p(\mathbf{y})}{(1 + \delta^2 \|\nabla_o p(\mathbf{y})\|_2^2)^{t/2}} - (1 - \exp(-t\delta^2 \|\nabla_o p(\mathbf{y})\|_2^2/2)) |p(\mathbf{y})| \\ &\geq \frac{p(\mathbf{y} + \delta \cdot \nabla_o p(\mathbf{y})) - p(\mathbf{y})}{(1 + \delta^2 \|\nabla_o p(\mathbf{y})\|_2^2)^{t/2}} - t\delta^2 \|\nabla_o p(\mathbf{y})\|_2^2 |p(\mathbf{y})|/2. \end{aligned}$$

We bound  $p(\mathbf{y} + \delta \cdot \nabla_o p(\mathbf{y})) - p(\mathbf{y})$  as follows: Let  $f(s) = p(\mathbf{y} + s\mathbf{v})$  for some unit vector  $\mathbf{v} \in \mathbb{R}^d$ . Noting that  $p$  is a degree- $t$  homogeneous polynomial, by Taylor expansion, we have that  $f(s) = f(0) + \sum_{j=1}^t \frac{f^{(j)}(0)s^j}{j!}$ . By elementary calculation, we have that  $f'(0) = \mathbf{v}^\top \nabla p(\mathbf{y})$ ,  $f''(0) = \mathbf{v}^\top \frac{\partial^2 p(\mathbf{y})}{\partial \mathbf{y}^2} \mathbf{v}$ ,  $\dots$ ,  $f^{(t)}(0) = \left\langle \mathbf{v}^{\otimes t}, \frac{\partial^t p(\mathbf{y})}{\partial \mathbf{y}^t} \right\rangle$ . By taking  $\mathbf{v}$  to be the direction of  $\nabla_o p(\mathbf{y})$ , i.e.,  $\mathbf{v} = \frac{\nabla_o p(\mathbf{y})}{\|\nabla_o p(\mathbf{y})\|_2}$ , we have that

$$p(\mathbf{y} + \delta \cdot \nabla_o p(\mathbf{y})) - p(\mathbf{y}) = f(\delta \|\nabla_o p(\mathbf{y})\|_2) - f(0) = \sum_{j=1}^t \frac{\left\langle \nabla_o p(\mathbf{y})^{\otimes j}, \frac{\partial^j p(\mathbf{y})}{\partial \mathbf{y}^j} \right\rangle \delta^j}{j!}.$$

Noting that the first order term is  $\delta \|\nabla_o p(\mathbf{y})\|_2^2$ , it suffices to show that the absolute value of  $\sum_{j=2}^t \frac{\langle \nabla_o p(\mathbf{y})^{\otimes j}, \frac{\partial^j p(\mathbf{y})}{\partial \mathbf{y}^j} \rangle \delta^j}{j!}$  is sufficiently small. Applying Lemma C.4 yields

$$\begin{aligned}
& \left| \sum_{j=2}^t \frac{\langle \nabla_o p(\mathbf{y})^{\otimes j}, \nabla^j p(\mathbf{y}) \rangle \delta^j}{j!} \right| \leq \sum_{j=2}^t \frac{\delta^j \|\nabla_o p(\mathbf{y})\|_2^j \left\| \frac{\partial^j p(\mathbf{y})}{\partial \mathbf{y}^j} \right\|_2}{j!} \\
& = \delta \|\nabla_o p(\mathbf{y})\|_2^2 \sum_{j=2}^t \frac{\delta^{j-1} \|\nabla_o p(\mathbf{y})\|_2^{j-2} \left\| \frac{\partial^j p(\mathbf{y})}{\partial \mathbf{y}^j} \right\|_2}{j!} \\
& \leq \delta \|\nabla_o p(\mathbf{y})\|_2^2 \left( \sum_{j=2}^t \frac{\delta^{j-1} \|\nabla p(\mathbf{y})\|_2^{2j-4}}{2j!} + \sum_{j=2}^t \frac{\delta^{j-1} \left\| \frac{\partial^j p(\mathbf{y})}{\partial \mathbf{y}^j} \right\|_2^2}{2j!} \right) \\
& \leq \delta \|\nabla_o p(\mathbf{y})\|_2^2 \left( \sum_{j=2}^t \frac{\delta^{j-1} (t(d+2t-2)N_{2(t-1),d})^{j-2}}{2j!} + \sum_{j=2}^t \frac{\delta^{j-1} t^j (d+2t-2)^j N_{2(t-j),d}}{2j!} \right).
\end{aligned}$$

Therefore, we will have that  $p(\mathbf{y} + \delta \cdot \nabla_o p(\mathbf{y})) - p(\mathbf{y}) \geq C' \delta \|\nabla_o p(\mathbf{y})\|_2^2$  for some universal constant  $0 < C' < 1$ , as long as  $\delta \leq 1/N_{2t,d}^2$ . Thus, by Lemma C.3, we have that

$$\begin{aligned}
p(\mathbf{z}) - p(\mathbf{y}) & \geq \frac{p(\mathbf{y} + \delta \cdot \nabla_o p(\mathbf{y})) - p(\mathbf{y})}{(1 + \delta^2 \|\nabla_o p(\mathbf{y})\|_2^2)^{t/2}} - t\delta^2 \|\nabla_o p(\mathbf{y})\|_2^2 |p(\mathbf{y})|/2 \\
& = \frac{C' \delta \|\nabla_o p(\mathbf{y})\|_2^2}{(1 + \delta^2 \|\nabla_o p(\mathbf{y})\|_2^2)^{t/2}} - t\delta^2 \|\nabla_o p(\mathbf{y})\|_2^2 |p(\mathbf{y})|/2 \\
& = C' \delta \|\nabla_o p(\mathbf{y})\|_2^2 \exp(-t\delta^2 \|\nabla_o p(\mathbf{y})\|_2^2/2) - t\delta^2 \|\nabla_o p(\mathbf{y})\|_2^2 |p(\mathbf{y})|/2 \\
& \geq C' \delta \|\nabla_o p(\mathbf{y})\|_2^2 (1 - t\delta^2 \|\nabla p(\mathbf{y})\|_2^2/2 - t\delta |p(\mathbf{y})|/2C') \\
& \geq \delta \|\nabla_o p(\mathbf{y})\|_2^2 \left( C'(1 - t^2 \delta^2 (d+2t-2)N_{2(t-1),d}/2) - t\delta \sqrt{N_{t,d}/2} \right) \\
& \geq C\delta \|\nabla_o p(\mathbf{y})\|_2^2,
\end{aligned}$$

for some universal constant  $0 < C < 1$ , as long as  $\delta \leq 1/N_{2t,d}^2$ . This completes the proof.  $\square$

## C.2 Proof of Lemma 4.4

Let  $p_1, \dots, p_N \in \Omega$  be an orthonormal basis, i.e.,  $\mathbf{E}[p_i(\mathbf{x})p_j(\mathbf{x})] = \mathbb{I}[i = j]$ . Let vector  $\mathbf{p}(\mathbf{x}) \stackrel{\text{def}}{=} [p_1(\mathbf{x}), \dots, p_N(\mathbf{x})]$ . We have that  $\mathbf{E}[\mathbf{p}(\mathbf{x})] = 0$  and  $\mathbf{Cov}[\mathbf{p}(\mathbf{x})] = \mathbf{I}_N$ .

$$\begin{aligned}
\Pr \left[ \left\| \frac{1}{r} \sum_{i=1}^r \mathbf{p}(\mathbf{x}_i) \right\|_2 \geq \eta \right] & = \Pr \left[ \frac{1}{r^2} \left\| \sum_{i=1}^r \mathbf{p}(\mathbf{x}_i) \right\|_2^2 \geq \eta^2 \right] = \Pr \left[ \frac{1}{r^2} \sum_{j=1}^N \left( \sum_{i=1}^r p_j(\mathbf{x}_i) \right)^2 \geq \eta^2 \right] \\
& \leq \frac{1}{\eta^2 r^2} \sum_{j=1}^N \mathbf{E} \left[ \left( \sum_{i=1}^r p_j(\mathbf{x}_i) \right)^2 \right] = \frac{N}{r\eta^2}.
\end{aligned}$$

We now assume that  $\frac{1}{r} \left\| \sum_{i=1}^r \mathbf{p}(\mathbf{x}_i) \right\|_2 \leq \eta$ . Let  $p \in \Omega$  be an arbitrary polynomial. We can write  $p(\mathbf{x}) = \sum_{j=1}^N \alpha_j p_j(\mathbf{x})$ , where  $\|p\|_2^2 = \sum_{j=1}^N \alpha_j^2$ . We have that

$$\begin{aligned}
\frac{1}{r} \left| \sum_{i=1}^r p(\mathbf{x}_i) \right| & = \frac{1}{r} \left| \sum_{i=1}^r \sum_{j=1}^N \alpha_j p_j(\mathbf{x}_i) \right| \leq \frac{1}{r} \sum_{j=1}^N |\alpha_j| \left| \sum_{i=1}^r p_j(\mathbf{x}_i) \right| \\
& \leq \frac{1}{r} \sqrt{\sum_{j=1}^N \alpha_j^2} \sqrt{\sum_{j=1}^N \left( \sum_{i=1}^r p_j(\mathbf{x}_i) \right)^2} = \frac{\|p\|_2}{r} \left\| \sum_{i=1}^r \mathbf{p}(\mathbf{x}_i) \right\|_2 \leq \eta \|p\|_2,
\end{aligned}$$

where the second inequality follows from Cauchy-Schwarz. This completes the proof.

### C.3 Proof of Theorem 4.6

Let  $p \in \partial\Omega_t^d$ . Since

$$\|\nabla p(\mathbf{y})\|_2^2 = \|\nabla_o p(\mathbf{y})\|_2^2 + \langle \mathbf{y}, \nabla p(\mathbf{y}) \rangle^2 = \|\nabla_o p(\mathbf{y})\|_2^2 + t^2 p(\mathbf{y})^2,$$

by Lemma 4.5, we have that  $p(\mathbf{z}) \geq p(\mathbf{y}) + C\delta(\|\nabla p(\mathbf{y})\|_2^2 - t^2 p(\mathbf{y})^2)$ . Let

$$q(\mathbf{y}) = p(\mathbf{y}) + C\delta\|\nabla_o p(\mathbf{y})\|_2^2 = p(\mathbf{y}) + C\delta(\|\nabla p(\mathbf{y})\|_2^2 - t^2 p(\mathbf{y})^2).$$

By definition, we have that  $q(\mathbf{y}) - \mathbf{E}[q(\mathbf{y})] = p(\mathbf{y}) + C\delta(\|\nabla p(\mathbf{y})\|_2^2 - t^2 p(\mathbf{y})^2) - C\delta\mathbf{E}[\|\nabla_o p(\mathbf{y})\|_2^2]$ , which is a polynomial of degree at most  $2t$  and contains only monomials of degree  $2t, 2t-2, t, 0$ . Let  $\Omega$  be the subspace of polynomials in  $d$ -variables containing all monomials of degree  $2t, 2t-2, t, 0$ . In this way, the dimension of  $\Omega$  is

$$N = \binom{d+2t-1}{d-1} + \binom{d+2t-3}{d-1} + \binom{d+t-1}{d-1} + 1 \leq 3N_{2t,d}.$$

Applying Lemma 4.4 yields that with probability at least  $1 - \frac{N}{r\eta^2}$ , we have that  $|\frac{1}{r} \sum_{i=1}^r q(\mathbf{y}_i) - \mathbf{E}[q(\mathbf{y})]| \leq \eta \|q(\mathbf{y}) - \mathbf{E}[q(\mathbf{y})]\|_2, \forall q \in \Omega$ . Therefore, we have that

$$\frac{1}{r} \sum_{i=1}^r p(\mathbf{z}_i) \geq \frac{1}{r} \sum_{i=1}^r q(\mathbf{y}_i) \geq \mathbf{E}[q(\mathbf{y})] - \eta \|q(\mathbf{y}) - \mathbf{E}[q(\mathbf{y})]\|_2 = \mathbf{E}[q(\mathbf{y})] - \eta \sqrt{\mathbf{E}[q(\mathbf{y})^2] - \mathbf{E}[q(\mathbf{y})]^2}.$$

By elementary calculation, we have that

$$\begin{aligned} \mathbf{E}[q(\mathbf{y})^2] - \mathbf{E}[q(\mathbf{y})]^2 &= \mathbf{E}[(p(\mathbf{y}) + C\delta\|\nabla_o p(\mathbf{y})\|_2^2)^2] - C^2\delta^2\mathbf{E}[\|\nabla_o p(\mathbf{y})\|_2^2]^2 \\ &= \mathbf{E}[p(\mathbf{y})^2] + 2C\delta\mathbf{E}[p(\mathbf{y})\|\nabla_o p(\mathbf{y})\|_2^2] + C^2\delta^2\mathbf{E}[\|\nabla_o p(\mathbf{y})\|_2^4] - C^2\delta^2\mathbf{E}[\|\nabla_o p(\mathbf{y})\|_2^2]^2 \\ &= \mathbf{E}[p(\mathbf{y})^2] + C^2\delta^2\mathbf{E}[\|\nabla_o p(\mathbf{y})\|_2^4] - C^2\delta^2\mathbf{E}[\|\nabla_o p(\mathbf{y})\|_2^2]^2 \\ &= 1 + C^2\delta^2\mathbf{E}[\|\nabla_o p(\mathbf{y})\|_2^4] - C^2\delta^2\mathbf{E}[\|\nabla_o p(\mathbf{y})\|_2^2]^2, \end{aligned}$$

where the second equality is due to  $p(\mathbf{y})$  being odd and

$$\begin{aligned} \|\nabla_o p(-\mathbf{y})\|_2^2 &= \|\nabla p(-\mathbf{y})\|_2^2 - t^2 p(-\mathbf{y})^2 = \|\nabla(-p(\mathbf{y}))\|_2^2 - t^2 (-p(\mathbf{y}))^2 \\ &= \|\nabla p(\mathbf{y})\|_2^2 - t^2 p(\mathbf{y})^2 = \|\nabla_o p(\mathbf{y})\|_2^2. \end{aligned}$$

By Lemma C.3 and Lemma C.4, we have that  $\mathbf{E}[\|\nabla_o p(\mathbf{y})\|_2^2] \geq d-1$  and  $\mathbf{E}[\|\nabla_o p(\mathbf{y})\|_2^4] \leq \mathbf{E}[\|\nabla p(\mathbf{y})\|_2^2] \sup_{\|\mathbf{y}\|_2=1} \|\nabla p(\mathbf{y})\|_2^2 \leq t^2(d+2t-2)^2 N_{2(t-1),d}$ . Therefore, we have that

$$\begin{aligned} \frac{1}{r} \sum_{i=1}^r p(\mathbf{z}_i) &\geq \mathbf{E}[q(\mathbf{y})] - \eta \sqrt{\mathbf{E}[q(\mathbf{y})^2] - \mathbf{E}[q(\mathbf{y})]^2} \\ &\geq C\delta\mathbf{E}[\|\nabla_o p(\mathbf{y})\|_2^2] - \eta \sqrt{1 + C^2\delta^2\mathbf{E}[\|\nabla_o p(\mathbf{y})\|_2^4] - C^2\delta^2\mathbf{E}[\|\nabla_o p(\mathbf{y})\|_2^2]^2} \\ &\geq C\delta(d-1) - \eta \sqrt{1 + C^2\delta^2(t^2(d+2t-2)^2 N_{2(t-1),d} - (d-1)^2)} \\ &= C\delta \left( d-1 - \eta \sqrt{\frac{1}{C^2\delta^2} + t^2(d+2t-2)^2 N_{2(t-1),d} - (d-1)^2} \right). \end{aligned}$$

Taking  $\delta = 1/N_{2t,d}^2$  and  $\eta = \frac{Cd}{3N_{2t,d}^2}$  yields that with probability at least

$$1 - \frac{N}{r\eta^2} \geq 1 - \frac{27}{C^2 d^2} \geq 99/100,$$

$$\begin{aligned} \frac{1}{r} \sum_{i=1}^r p(\mathbf{z}_i) &\geq C\delta \left( d-1 - \eta \sqrt{N_{2t,d}^4/C^2 + t^2(d+2t-2)^2 N_{2(t-1),d} - (d-1)^2} \right) \\ &> C\delta \left( d/2 - \eta \sqrt{2N_{2t,d}^4/C^2} \right) \geq 0. \end{aligned}$$

#### C.4 Omitted Calculations in Proof of Theorem 4.2

By elementary calculation, we have that

$$\begin{aligned}\|\mathbf{z}_i^* - \mathbf{y}_i\|_2 &= \left\| \frac{\mathbf{y}_i + \delta \nabla_o p^*(\mathbf{y}_i)}{\|\mathbf{y}_i + \delta \nabla_o p^*(\mathbf{y}_i)\|_2} - \mathbf{y}_i \right\|_2 = \frac{\|\mathbf{y}_i + \delta \nabla_o p^*(\mathbf{y}_i) - \|\mathbf{y}_i + \delta \nabla_o p^*(\mathbf{y}_i)\|_2 \mathbf{y}_i\|_2}{\|\mathbf{y}_i + \delta \nabla_o p^*(\mathbf{y}_i)\|_2} \\ &\leq \frac{|1 - \|\mathbf{y}_i + \delta \nabla_o p^*(\mathbf{y}_i)\|_2| + \delta \|\nabla p^*(\mathbf{y}_i)\|_2}{1 - \delta \|\nabla p^*(\mathbf{y}_i)\|_2} \leq \frac{2\delta \|\nabla p^*(\mathbf{y}_i)\|_2}{1 - \delta \|\nabla p^*(\mathbf{y}_i)\|_2} \leq O(1/N_{2t,d}),\end{aligned}$$

where the last inequality follows from for any  $\mathbf{y} \in \mathbb{S}^{d-1}$ ,  $\|\nabla p^*(\mathbf{y})\|_2 \leq \sqrt{t(d+2t-2)N_{2(t-1),d}\|p^*\|_2^2} \leq N_{2t,d}$  by Lemma C.3.

#### C.5 Omitted Calculations in Proof of Theorem 1.2

In this section, we provide calculation details to show that  $r \geq N_{2k,m}$  and  $N_{2k,m} \leq \Omega((1/\Delta)^{1.89})$ . We have the following chain of inequalities:

$$\begin{aligned}N_{2k,m}^5 &\leq \binom{m+2k}{2k}^5 = \binom{(1+2c')m}{m}^5 \leq 2^{5(1+2c')mH\left(\frac{1}{1+2c'}\right)} = 2^{5(1+2c')m\left(\frac{\log(1+2c')}{1+2c'} + \frac{2c' \log(1+1/2c')}{1+2c'}\right)} \\ &= 2^{5m(\log(1+2c') + 2c' \log(1+1/2c'))} \leq 2^{\frac{5c \log r (\log(1+2c') + 2c' \log(1+1/2c'))}{\log(1/\Delta)}} \leq r,\end{aligned}$$

where  $H(p) = -p \log p - (1-p) \log(1-p)$ ,  $p \in [0, 1]$ , is the standard binary entropy function. On the other hand, by our choice of  $m$ , we have that

$$\begin{aligned}N_{2k,m} &= \binom{m+2k-1}{m-1} = \binom{(1+2c')m-1}{m-1} \geq \left(\frac{(1+2c')m-1}{m-1}\right)^{m-1} \geq (1+2c')^{m-1} \\ &\geq (1+2c')^{\frac{1.99 \log r}{\log(1/\Delta)}-1} = \left((1/e)(1/\Delta)^{1/5c}\right)^{\frac{1.89 \log r}{\log(1/\Delta)}} \geq \Omega((1/\Delta)^{1.89}).\end{aligned}$$
